# Supplementary material for: Selective synthesis of pure CsPbBr3 and pure Cs4PbBr6 nanocrystals towards the fine control of their emission properties
Source: Research Square preprint supplement (doi:10.21203/rs.3.rs-8742423/v1), 2026-02-20
Supplement: Supplementary file 1 [file bfc15754d9a79161f9b7e937.docx]

Supplementary Information

Selective synthesis of pure CsPbBr3 and pure Cs4PbBr6 nanocrystals towards the fine control of their emission properties

Svetlana Siprova,a,b,c* Vincenzo Caligiuri,a,c Attilio Golemme,a,b,c Roberto Termine,c Antonio De Luca,a,c Iolinda Aiello,b,c,d* Giuseppe Fraschini,d Gianluca Balestra,e,f Massimo Cuscunà,e Maria Laura Amoruso,g,h Mario Scuderi,g Nicolas Godbert.b,d*

1. Dipartimento di Fisica, Università della Calabria, via P. Bucci 33b, Rende (CS), 87036, Italy
2. LPM-Laboratorio Preparazione Materiali, STAR-Lab, Università della Calabria, via Tito Flavio, Rende (CS), 87036, Italy
3. Istituto di Nanotecnologia (CNR-NANOTEC) SS di Rende, via P. Bucci 33c, Rende (CS), 87036, Italy
4. MAT-InLAB, LASCAMM CR-INSTM, Unità INSTM della Calabria, Dipartimento di Chimica e Tecnologie Chimiche, Università della Calabria, via P. Bucci 14c, Rende (CS), 87036, Italy
5. CNR Nanotec Institute of Nanotechnology, Via Monteroni, Lecce, 73100, Italy
6. Department of Mathematics and Physics Ennio De Giorgi, University of Salento, Lecce, 73100, Italy
7. CNR–IMM, Strada VIII n.5 Zona Industriale, Catania, 95121, Italy
8. UniMe MIFT, Viale Ferdinando Stagno D'Alcontres, Messina, 98166, Italy

*Corresponding Author’s email: [svetlana.siprova@cnr.it](mailto:svetlana.siprova@cnr.it); [nicolas.godbert@unical.it](mailto:nicolas.godbert@unical.it); [iolinda.aiello@unical.it](mailto:iolinda.aiello@unical.it).

1. **Synthesis of CsPbBr3 nanocrystals**

A suspension containing 80 mg (0.25 mmol) of cesium carbonate and 380 mg (1 mmol) of lead acetate trihydrate in 5 mL of oleylamine (OLAM), 1.5 mL of oleic acid (OA), and 25 mL of octadecene (ODE) was stirred and heated at 125°C in an oil bath under vacuum for 2 h. During the first 20 min, a substantial gas release occurred because of decarboxylation of the precursors. The resulting clear and transparent solution was then transferred under a nitrogen atmosphere to an oil bath maintained at 165°C. After 15 min, 355 µL (3 mmol) of benzoyl bromide was rapidly injected, and the reaction mixture was immediately quenched in an ice bath by the addition of 15 mL of dry toluene. Upon cooling, a bright yellow-green fine precipitate formed and was collected by centrifugation (5 min at 5000 rpm). The supernatant was discarded, and 15 mL of dry toluene was added to the precipitate, followed by vigorous shaking to wash the formed nanocrystals (NCs). After a second centrifugation step and removal of the supernatant, 5 mL of *n*-hexane was added, and the NCs were stored in sealed bottles at 4°C.

1. **Synthesis of CsPbCl3 nanocrystals**

The synthesis of CsPBCl3 NCs was performed according to the previously described protocol used for CsPbBr3 NCs, but benzoyl chloride (345 µL, 3 mmol) was employed instead of benzoyl bromide.

1. **Synthesis of Cs4PbBr6 nanocrystals**

A suspension containing 651 mg (2 mmol) of cesium carbonate and 380 mg (1 mmol) of lead acetate trihydrate in 7.5 mL of OLAM, 2.25 mL of OA, and 30 mL of ODE was stirred and heated at 125°C in an oil bath under vacuum for 2 h. During the first 20 min, a substantial gas release occurred because of decarboxylation of the precursors. The resulting clear and transparent solution was then transferred under a nitrogen atmosphere to an oil bath maintained at 50°C. After 15 min, 710 µL (6 mmol) of benzoyl bromide was rapidly injected, and the reaction mixture was immediately quenched in an ice bath by the addition of 15 mL of dry toluene. Upon cooling, a white fine precipitate formed and was collected by centrifugation (5 min at 5000 rpm). The supernatant was discarded, and 15 mL of dry toluene was added to the precipitate, followed by vigorous shaking to wash the formed NCs. After a second centrifugation step and removal of the supernatant, 5 mL of *n*-hexane was added, and the NCs were stored in sealed bottles at 4°C.

1. **Synthesis of CsPBCl6 nanocrystals**

The synthesis of Cs4PBCl6 NCs was performed according to the previously described protocol used for Cs4PbBR6 NCs, but benzoyl chloride (690 µL, 6 mmol) was employed instead of benzoyl bromide.

1. **Cathodoluminescence analysis of CsPbBr3/Cs4PbBr6 nanocrystals**

As observed, the cathodoluminescence (CL) emission from NCs with cubic morphology corresponding to the CsPbBr3 structure, as demonstrated by transmission electron microscopy (TEM) analysis in the main text, is highly pronounced. In contrast, the CL emission from crystals with rhombohedral morphology (Cs4PbBr6) shows negligible intensity compared to that of CsPbBr3.


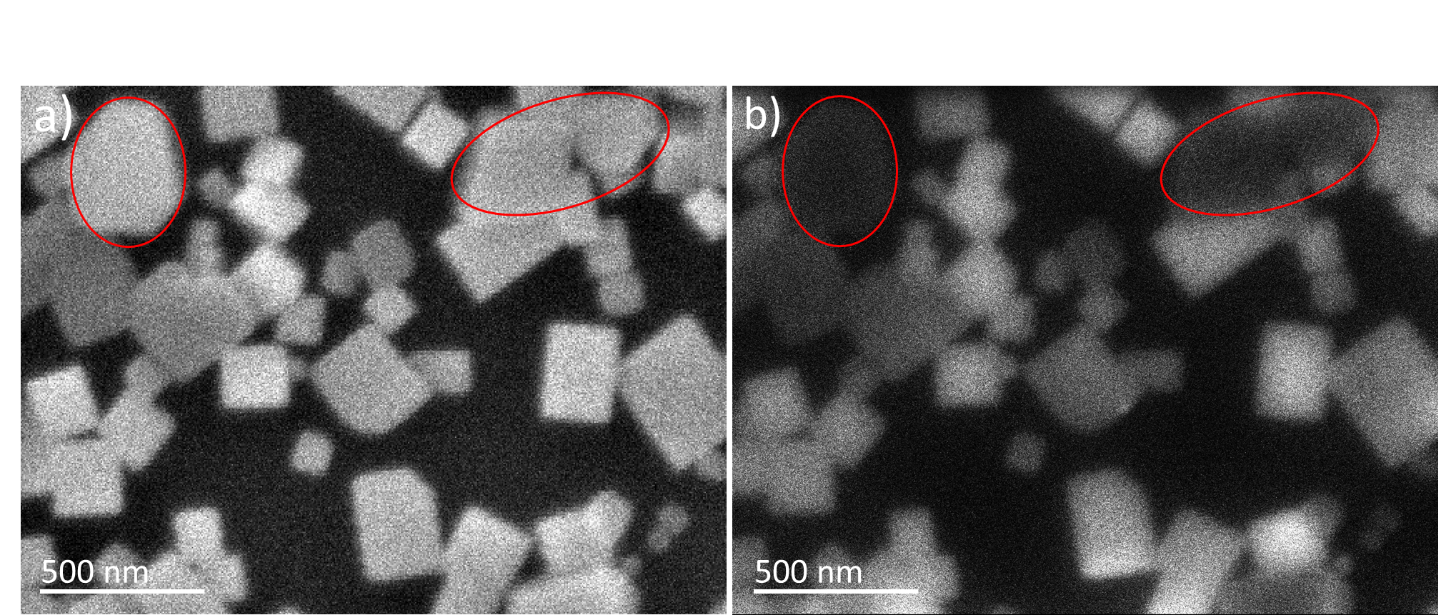


Fig.S1 (a) SEM image of a sample composed of CsPbBr3 (cubic morphology) and Cs4PbBr6 (rhombohedral morphology) perovskite nanocrystals (NCs). (b) Corresponding cathodoluminescence (CL) intensity map. The circled areas in both images highlight a few Cs4PbBr6 NCs. The CL emission from these NCs is negligible compared to that of the crystals with cubic morphology (CsPbBr3).

1. **Powder X-Ray Diffraction (PXRD) of Cs4PbBr6 nanocrystals**

PXRD measurements of Cs4PbBr6 NCs synthetized with different injection temperature were performed though accumulation in the range 2θ = 13-18° (Fig.S2a) and in the range 2θ = 20.5-22° (Fig.S2b), regions where the reflection peaks associated to the d100 (2θ = 15.1°) and the d110 (2θ = 21.4°) of the cubic system of CsPbBR3 are respectively expected. Red line: samples after annealing at 115°C for 10 min. Black line: samples without annealing treatment.

**
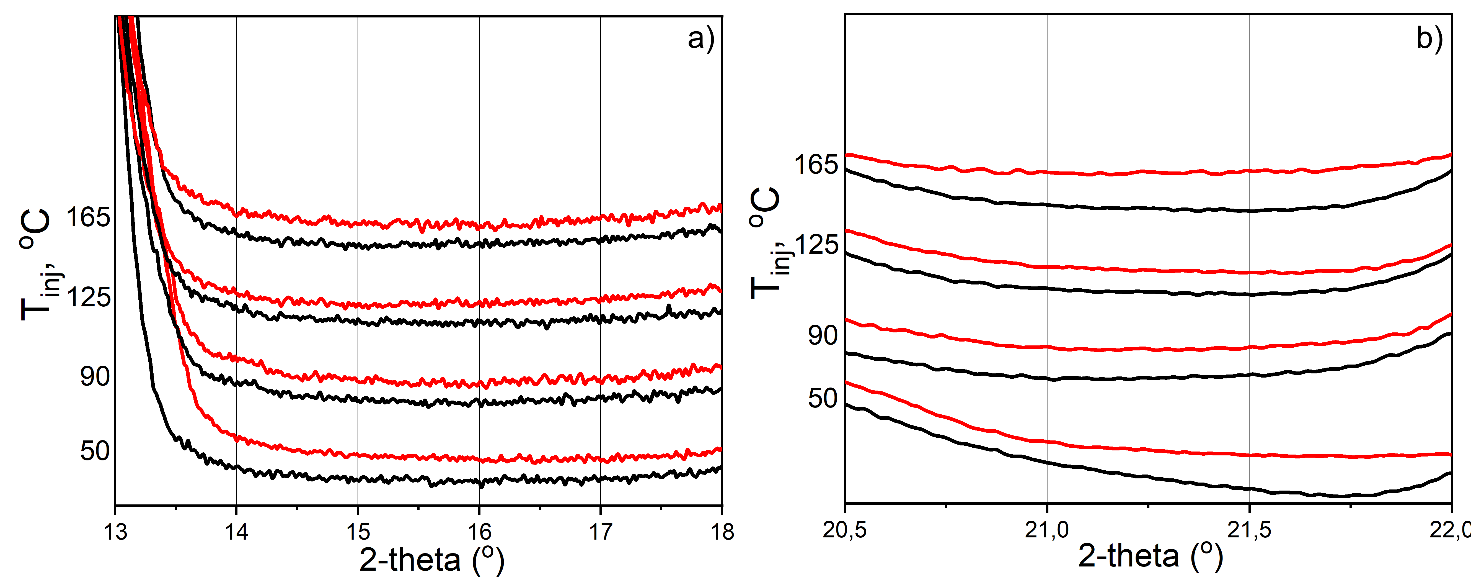
**

Fig.S2 PXRD patterns of drop casted films of Cs4PbBr6 NCs synthetized with different injection temperature (Tinj) of the PhCOBr: 50°C, 90°C, 125°C and 165°C.
